# Supplementary material for: Molecular Characterization and Haplotype Analysis of Low Phytic Acid-1 (lpa1) Gene Governing Accumulation of Kernel Phytic Acid in Subtropically-Adapted Maize
Source: MDPI journal article supplement (doi:10.3390/agriculture13071286), 2023-06-22
Supplement: s1 [file s1]

# Molecular Characterization and Haplotype Analysis of *Low Phytic Acid-1 (lpa1)* Gene Governing Accumulation of Kernel Phytic Acid in Subtropically-Adapted Maize

Vinay Bhatt <sup>1,2</sup>, Vignesh Muthusamy <sup>1,\*</sup>, Rashmi Chhabra <sup>1</sup>, Ashvinkumar Katral <sup>1</sup>, Shridhar Ragi <sup>1</sup>, Vinay Rojaria <sup>1</sup>, Gulab Chand <sup>1</sup>, Govinda Rai Sarma <sup>1</sup>, Rajkumar Uttamrao Zunjare <sup>1</sup>, Kusuma Kumari Panda <sup>2</sup>, Ashok Kumar Singh <sup>1</sup> and Firoz Hossain <sup>1</sup>

<sup>1</sup> Division of Genetics, ICAR-Indian Agricultural Research Institute, New Delhi 110012, India; vinaybhatt024@gmail.com (V.B.); resh0428@rediffmail.com (R.C.); ashokgkatral@gmail.com (A.K.); shridharragi1996@gmail.com (S.R.); vvinyay3878@yahoo.com (V.R.); gulab.biotech@yahoo.com (G.C.); raisarmag@gmail.com (G.R.S.); raj\_gpb@yahoo.com (R.U.Z.); aks\_gene@yahoo.com (A.K.S.); fh\_gpb@yahoo.com (F.H.)

<sup>2</sup> AMITY Institute of Biotechnology, AMITY University, Noida, Uttar Pradesh 201313, India; pkkumari@amity.edu

\* Correspondence: pmvignesh@yahoo.co.in

## SUPPLEMENTARY MATERIAL

**Table S1. Information on the 48 maize inbreds utilised in an *InDel*-based gene diversity analysis (WT: wild-type; MT: mutant-type)**

| S. No. | Inbreds   | Type | Source               |
|--------|-----------|------|----------------------|
| 1      | UMI1200   | WT   | TNAU, Coimbatore     |
| 2      | UMI1230   | WT   | TNAU, Coimbatore     |
| 3      | V335      | WT   | ICAR-VPKAS, Almora   |
| 4      | V373      | WT   | ICAR-VPKAS, Almora   |
| 5      | BML6      | WT   | PJTSAU, Telangana    |
| 6      | BML7      | WT   | PJTSAU, Telangana    |
| 7      | BML45     | WT   | PJTSAU, Telangana    |
| 8      | CM145     | WT   | ICAR-IIMR, Ludhiana  |
| 9      | CM212     | WT   | ICAR-IIMR, Ludhiana  |
| 10     | LM11      | WT   | PAU, Ludhiana        |
| 11     | LM13      | WT   | PAU, Ludhiana        |
| 12     | LM14      | WT   | PAU, Ludhiana        |
| 13     | LM17      | WT   | PAU, Ludhiana        |
| 14     | E40(3)    | WT   | MPUAT, Udaipur       |
| 15     | E128(1)   | WT   | MPUAT, Udaipur       |
| 16     | BKI-4(3)  | WT   | ICAR-IIMR, New Delhi |
| 17     | BK9-2     | WT   | ICAR-IIMR, New Delhi |
| 18     | HKI1040-7 | WT   | CCSHAU, Hisar        |
| 19     | HKI1344   | WT   | CCSHAU, Hisar        |

|    |             |    |                      |
|----|-------------|----|----------------------|
| 20 | HKI1378     | WT | CCSHAU, Hisar        |
| 21 | PMI-PV1     | WT | ICAR-IARI, New Delhi |
| 22 | PMI-PV2     | WT | ICAR-IARI, New Delhi |
| 23 | PMI-PV10    | WT | ICAR-IARI, New Delhi |
| 24 | PMI-PV12    | WT | ICAR-IARI, New Delhi |
| 25 | CML51       | WT | CIMMYT, Mexico       |
| 26 | CML116      | WT | CIMMYT, Mexico       |
| 27 | CML150      | WT | CIMMYT, Mexico       |
| 28 | CML165      | WT | CIMMYT, Mexico       |
| 29 | CML202      | WT | CIMMYT, Mexico       |
| 30 | CML320      | WT | CIMMYT, Mexico       |
| 31 | CML385      | WT | CIMMYT, Mexico       |
| 32 | CML410      | WT | CIMMYT, Mexico       |
| 33 | CML451      | WT | CIMMYT, Mexico       |
| 34 | CML465      | WT | CIMMYT, Mexico       |
| 35 | CML470      | WT | CIMMYT, Mexico       |
| 36 | CML473      | WT | CIMMYT, Mexico       |
| 37 | CML474      | WT | CIMMYT, Mexico       |
| 38 | CML487      | WT | CIMMYT, Mexico       |
| 39 | CML511      | WT | CIMMYT, Mexico       |
| 40 | CML550      | WT | CIMMYT, Mexico       |
| 41 | CML559      | WT | CIMMYT, Mexico       |
| 42 | CML602      | WT | CIMMYT, Mexico       |
| 43 | PMI-LP1-110 | MT | ICAR-IARI, New Delhi |
| 44 | PMI-LP1-112 | MT | ICAR-IARI, New Delhi |
| 45 | PMI-LP1-115 | MT | ICAR-IARI, New Delhi |
| 46 | PMI-LP1-116 | MT | ICAR-IARI, New Delhi |
| 47 | PMI-LP1-120 | MT | ICAR-IARI, New Delhi |
| 48 | PMI-LP1-123 | MT | ICAR-IARI, New Delhi |

**Table S2.** Details of overlapping primers developed for sequencing full length *Lpal-1* gene

| S. No. | Primer                | Sequence              |
|--------|-----------------------|-----------------------|
| 1      | MGU- <i>lpal</i> -A-F | ACCCCAATGCCTTTTAAACC  |
|        | MGU- <i>lpal</i> -A-R | GGCCACCTCGTAGCTCAG    |
| 2      | MGU- <i>lpal</i> -B-F | CGTGCTGAGCTACGAGGTG   |
|        | MGU- <i>lpal</i> -B-R | CCATCCTCCGTAAACTCCAA  |
| 3      | MGU- <i>lpal</i> -C-F | TTGGAGTTTACGGAGGATGG  |
|        | MGU- <i>lpal</i> -C-R | CAACGGACTAAGCCATGACA  |
| 4      | MGU- <i>lpal</i> -D-F | TTGCTGCTGTCAACACGATT  |
|        | MGU- <i>lpal</i> -D-R | ATGGCGAGAGCAAGAATGAT  |
| 5      | MGU- <i>lpal</i> -E-F | AAAGCTGCAGGAGCACTACC  |
|        | MGU- <i>lpal</i> -E-R | ATGCGCCATCCTTAATATCG  |
| 6      | MGU- <i>lpal</i> -F-F | TGGAACCCATACACTCTGACC |
|        | MGU- <i>lpal</i> -F-R | CCAGTATGAGCATCAACAGCA |
| 7      | MGU- <i>lpal</i> -G-F | TCCCTTCAGTGCTGTTGATG  |
|        | MGU- <i>lpal</i> -G-R | TTTGTAAGCTTCCCCCATGT  |
| 8      | MGU- <i>lpal</i> -H-F | AAGGGAACGTGGAAAAGTGA  |
|        | MGU- <i>lpal</i> -H-R | ACCAGATGGTGTGGTGTCAA  |
| 9      | MGU- <i>lpal</i> -I-F | GCGTTCAGACTTGGTGGATT  |
|        | MGU- <i>lpal</i> -I-R | CATGCAAAAAGCAAAGACGA  |
| 10     | MGU- <i>lpal</i> -J-F | GGAATTGCTTTCGACTTTTCG |
|        | MGU- <i>lpal</i> -J-R | CCGCCAGGAAACATACAACCT |
| 11     | MGU- <i>lpal</i> -K-F | TCAAGGTCCGCTACAAGGAC  |
|        | MGU- <i>lpal</i> -K-R | TTGGAACGAATGACCTCTCC  |
| 12     | MGU- <i>lpal</i> -L-F | GGAGAGGTCATTCGTTCCAA  |
|        | MGU- <i>lpal</i> -L-R | GTGGGAATACGGTGAGCAAT  |
| 13     | MGU- <i>lpal</i> -M-F | CCGTATTCCCACCGTTATTG  |
|        | MGU- <i>lpal</i> -M-R | CATGGCAGATACGGGCTATT  |

F-Forward, R-Reverse

**Table S3. Primer details employed for gene-based diversity in *Lpa1-1* gene**

| S. no | Marker                 | Sequence (5'→3')         | Amplicon size (bp) | Region  |
|-------|------------------------|--------------------------|--------------------|---------|
| 1     | <i>lpa1</i> -InDel-1F  | GGATTACGCGCACATGGT       | 72                 | E1      |
|       | <i>lpa1</i> -InDel-1R  | ATGACACCAACCAAGCACAG     |                    |         |
| 2     | <i>lpa1</i> -InDel-2F  | GATCCTCAGCCTTGCAACAT     | 86                 | E1      |
|       | <i>lpa1</i> -InDel-2R  | AGGGTATGTCAGCCAACTCAA    |                    |         |
| 3     | <i>lpa1</i> -InDel-3F  | GACCGTGCAAAGTCATGCTA     | 72                 | E1      |
|       | <i>lpa1</i> -InDel-3R  | CCTGCCAGGGTATTCTAGCC     |                    |         |
| 4     | <i>lpa1</i> -InDel-4F  | TTGCTGCTGTCAACACGATT     | 75                 | E1      |
|       | <i>lpa1</i> -InDel-4R  | TGCCACTGAGGTAGTCCACA     |                    |         |
| 5     | <i>lpa1</i> -InDel-5F  | TACTCGGGGAGATACCCAAA     | 158                | E1-E2   |
|       | <i>lpa1</i> -InDel-5R  | TCCATGCAGTCTGAGGAACA     |                    |         |
| 6     | <i>lpa1</i> -InDel-6F  | TCCCTTCAGTGCTGTTGATG     | 154                | E2-E3   |
|       | <i>lpa1</i> -InDel-6R  | TTTTGGTTGCTAGTGCAGTCA    |                    |         |
| 7     | <i>lpa1</i> -InDel-7F  | TGGCTACGTTTGGTTTAGCA     | 100                | E4      |
|       | <i>lpa1</i> -InDel-7R  | CCAGATGGTGTGGTGTCAAA     |                    |         |
| 8     | <i>lpa1</i> -InDel-8F  | GCGTTCAGACTTGGTGGATT     | 80                 | E5      |
|       | <i>lpa1</i> -InDel-8R  | TGCCATGTGACTTTGCTCAT     |                    |         |
| 9     | <i>lpa1</i> -InDel-9F  | CCTTGGGAATTGTTGCTGTCA    | 575                | E5-E6   |
|       | <i>lpa1</i> -InDel-9R  | AATCCTAGTTAGTTCCCTTGATGA |                    |         |
| 10    | <i>lpa1</i> -InDel-10F | CTCTGCCTGCGAATGGAAT      | 101                | E6-I6   |
|       | <i>lpa1</i> -InDel-10R | ATAAACATACTTGGTTTCGAT    |                    |         |
| 11    | <i>lpa1</i> -InDel-11F | CATGGCCTCAGAATGGAAAC     | 308                | E7-E8   |
|       | <i>lpa1</i> -InDel-11R | CCGCCAGGAAACATACTAACT    |                    |         |
| 12    | <i>lpa1</i> -InDel-12F | GAATGAACCTTGATCCTCTTGA   | 159                | E8-E9   |
|       | <i>lpa1</i> -InDel-12R | TGACCTCTCCTAGCTGACACTTT  |                    |         |
| 13    | <i>lpa1</i> -InDel-13F | CCGTATTCCCACCGTTATTG     | 278                | E10-E11 |
|       | <i>lpa1</i> -InDel-13R | CGTGTCGAACTCTGCGATT      |                    |         |
| 14    | <i>lpa1</i> -InDel-14F | CCCAAACCTGGCAACAGA       | 75                 | E11     |
|       | <i>lpa1</i> -InDel-14R | TTCGCAGGGACCTCTATGG      |                    |         |
| 15    | <i>lpa1</i> -InDel-15F | ACATTACCCGAAGCTGATGC     | 85                 | E11     |
|       | <i>lpa1</i> -InDel-15R | TCCCTTGGTTCTCCACTCTG     |                    |         |

F represents Forward; R represents Reverse; E represents exon

**Table S4.** Evolutionary distance and synonymous and non-synonymous scores in comparison with reference *Lpal* (Gene ID: Zm00001eb003490)

| S. No. | Inbred                  | Pairwise distance | Ks     | Ka     | Ka/Ks    |
|--------|-------------------------|-------------------|--------|--------|----------|
| 1      | <i>Lpal</i> -wild-1     | 0.00922           | 0.0073 | 0.0051 | 0.69863  |
| 2      | <i>Lpal</i> -wild-2     | 0.00962           | 0.0085 | 0.0057 | 0.670588 |
| 3      | <i>Lpal</i> -wild-3     | 0.01346           | 0.0105 | 0.0087 | 0.828571 |
| 4      | <i>Lpal</i> -wild-4     | 0.01264           | 0.0098 | 0.009  | 0.918367 |
| 5      | <i>Lpal</i> -wild-5     | 0.01875           | 0.0149 | 0.0158 | 1.060403 |
| 6      | <i>Lpal</i> -wild-6     | 0.01306           | 0.0095 | 0.0079 | 0.831579 |
| 7      | <i>Lpal</i> -wild-7     | 0.01209           | 0.0129 | 0.009  | 0.697674 |
| 8      | <i>lpal-l</i> -mutant-1 | 0.01237           | 0.0141 | 0.0111 | 0.787234 |
| 9      | <i>lpal-l</i> -mutant-2 | 0.01894           | 0.0178 | 0.0141 | 0.792135 |
| 10     | <i>lpal-l</i> -mutant-3 | 0.00603           | 0.0063 | 0.0044 | 0.698413 |

**Table S5.** Structural characteristics of the *Lpal-1* gene in maize genotypes and selected group of orthologue accessions

| S. No. | Accession                 | Crop species                   | Family        | No. of exons | Exon range (bp) | Intron range (bp) | Coding sequence |
|--------|---------------------------|--------------------------------|---------------|--------------|-----------------|-------------------|-----------------|
| 1      | Zm00001eb003490           | <i>Zea mays</i>                | Poaceae       | 11           | 66-2314         | 67-445            | 4530            |
| 2      | <i>Lpal</i> -wild-1       |                                | Poaceae       | 19           | 21-489          | 38-639            | 3588            |
| 3      | <i>Lpal</i> -wild-2       |                                | Poaceae       | 14           | 63-981          | 76-575            | 3381            |
| 4      | <i>Lpal</i> -wild-3       |                                | Poaceae       | 16           | 21-576          | 36-450            | 3228            |
| 5      | <i>Lpal</i> -wild-4       |                                | Poaceae       | 14           | 63-984          | 49-537            | 3825            |
| 6      | <i>Lpal</i> -wild-5       |                                | Poaceae       | 16           | 48-771          | 52-659            | 3255            |
| 7      | <i>Lpal</i> -wild-6       |                                | Poaceae       | 16           | 39-1059         | 75-450            | 3558            |
| 8      | <i>Lpal</i> -wild-7       |                                | Poaceae       | 13           | 63-639          | 79-450            | 3528            |
| 9      | <i>lpal-1</i> -mutant-1   |                                | Poaceae       | 14           | 21-597          | 66-892            | 3012            |
| 10     | <i>lpal-1</i> -mutant-2   |                                | Poaceae       | 14           | 21-378          | 76-483            | 1896            |
| 11     | <i>lpal-1</i> -mutant-3   |                                | Poaceae       | 17           | 21-552          | 76-635            | 3402            |
| 12     | AET4Gv20803900            | <i>Aegilops tauschii</i>       | Poaceae       | 11           | 63-1782         | 55-502            | 4365            |
| 13     | Aco010163                 | <i>Ananas comosus</i>          | Bromeliaceae  | 9            | 63-2076         | 93-947            | 4125            |
| 14     | A4U43_C10F18740           | <i>Asparagus officinalis</i>   | Asparagaceae  | 6            | 6-219           | 58-101            | 387             |
| 15     | BRADI_1g75590v3           | <i>Brachypodium distachyon</i> | Poaceae       | 10           | 63-2046         | 77-805            | 3933            |
| 16     | DRNTG_05198               | <i>Dioscorea rotundata</i>     | Dioscoreaceae | 11           | 63-2043         | 87-1350           | 4566            |
| 17     | EJB05_08061               | <i>Eragrostis curvula</i>      | Poaceae       | 12           | 63-1944         | 95-635            | 4584            |
| 18     | HORVU.MOREX.r3.4HG0412040 | <i>Hordeum vulgare</i>         | Poaceae       | 11           | 63-2049         | 80-564            | 4281            |
| 19     | LPERR03G03070             | <i>Leersia perrieri</i>        | Poaceae       | 11           | 39-2043         | 76-637            | 3666            |
| 20     | Ma08_g12530               | <i>Musa acuminata</i>          | Musaceae      | 11           | 63-2046         | 74-2449           | 4590            |
| 21     | Ma11_g02290               | <i>Musa acuminata</i>          | Musaceae      | 13           | 42-2043         | 71-2653           | 4626            |
| 22     | OBART03G03330             | <i>Oryza barthii</i>           | Poaceae       | 10           | 63-1683         | 80-450            | 3711            |

|    |                        |                                    |         |    |         |         |      |
|----|------------------------|------------------------------------|---------|----|---------|---------|------|
| 23 | OB03G13350             | <i>Oryza brachyantha</i>           | Poaceae | 10 | 60-1671 | 81-769  | 3384 |
| 24 | GQ55_9G618800          | <i>Panicum hallii HAL2</i>         | Poaceae | 7  | 63-2040 | 78-2074 | 2934 |
| 25 | SECCE5Rv1G0369730      | <i>Secale cereale</i>              | Poaceae | 12 | 63-2058 | 80-372  | 4704 |
| 26 | SEVIR_9G548400v2       | <i>Setaria viridis</i>             | Poaceae | 14 | 63-2049 | 76-431  | 5226 |
| 27 | SORBI_3001G508200      | <i>Sorghum bicolor</i>             | Poaceae | 9  | 63-2067 | 77-1019 | 3342 |
| 28 | TraesCS5A02G512500     | <i>Triticum aestivum</i>           | Poaceae | 11 | 63-1914 | 79-374  | 4383 |
| 29 | TRIDC4BG057910         | <i>Triticum dicoccoides</i>        | Poaceae | 11 | 63-1911 | 79-414  | 4215 |
| 30 | TRITD5Av1G244640       | <i>Triticum turgidum</i>           | Poaceae | 11 | 63-1914 | 79-374  | 4383 |
| 31 | TuG1812G0500005238.01  | <i>Triticum urartu</i>             | Poaceae | 11 | 63-2061 | 79-374  | 4530 |
| 32 | OsABCC13               | <i>Oryza sativa Japonica Group</i> | Poaceae | 12 | 63-2043 | 76-705  | 4341 |
| 33 | ABCC13<br>BGIOGA011835 | <i>Oryza sativa Indica Group</i>   | Poaceae | 10 | 63-2043 | 76-450  | 4071 |
| 34 | ORUF103G03050          | <i>Oryza rufipogon</i>             | Poaceae | 12 | 63-2046 | 76-705  | 4344 |
| 35 | ONIVA03G03060          | <i>Oryza nivara</i>                | Poaceae | 11 | 63-2043 | 76-450  | 4233 |
| 36 | Et_s2678-1.30-1.path1  | <i>Eragrostis tef</i>              | Poaceae | 11 | 27-537  | 79-384  | 2133 |
| 37 | SETIT_033885mg         | <i>Setaria italica</i>             | Poaceae | 12 | 63-2049 | 77-431  | 4305 |

**Table S6.** *Zea mays* LPA1 protein (Protein ID: A7KVC2) domains and features

| S. No. | Domain source    | Start | End  | Description                                                  | Accession       |
|--------|------------------|-------|------|--------------------------------------------------------------|-----------------|
| 1      | PANTHER          | 83    | 1510 | -                                                            | PTHR24223       |
| 2      | PANTHER          | 83    | 1510 | -                                                            | PTHR24223:SF391 |
| 3      | Gene3D           | 289   | 612  | ABC transporter type 1, transmembrane domain superfamily     | 1.20.1560.10    |
| 4      | Superfamily      | 303   | 613  | ABC transporter type 1, transmembrane domain superfamily     | SSF90123        |
| 5      | CDD              | 316   | 603  | ABC transporter C family, six-transmembrane helical domain 1 | cd18579         |
| 6      | Pfam             | 319   | 583  | ABC transporter type 1, transmembrane domain                 | PF00664         |
| 7      | PROSITE profiles | 320   | 595  | ABC transporter type 1, transmembrane domain                 | PS50929         |

|    |                  |      |      |                                                              |              |
|----|------------------|------|------|--------------------------------------------------------------|--------------|
| 8  | Superfamily      | 625  | 851  | P-loop containing nucleoside triphosphate hydrolase          | SSF52540     |
| 9  | Gene3D           | 627  | 859  | P-loop containing nucleoside triphosphate hydrolase          | 3.40.50.300  |
| 10 | PROSITE profiles | 629  | 852  | ABC transporter-like, ATP-binding domain                     | PS50893      |
| 11 | CDD              | 629  | 828  | -                                                            | cd03250      |
| 12 | Pfam             | 647  | 781  | ABC transporter-like, ATP-binding domain                     | PF00005      |
| 13 | SMART            | 656  | 829  | AAA+ ATPase domain                                           | SM00382      |
| 14 | PROSITE patterns | 754  | 768  | ABC transporter-like, conserved site                         | PS00211      |
| 15 | Gene3D           | 908  | 1248 | ABC transporter type 1, transmembrane domain superfamily     | 1.20.1560.10 |
| 16 | Superfamily      | 947  | 1249 | ABC transporter type 1, transmembrane domain superfamily     | SSF90123     |
| 17 | CDD              | 948  | 1242 | ABC transporter C family, six-transmembrane helical domain 2 | cd18580      |
| 18 | PROSITE profiles | 950  | 1220 | ABC transporter type 1, transmembrane domain                 | PS50929      |
| 19 | Pfam             | 951  | 1190 | ABC transporter type 1, transmembrane domain                 | PF00664      |
| 20 | Gene3D           | 1250 | 1502 | P-loop containing nucleoside triphosphate hydrolase          | 3.40.50.300  |
| 21 | Superfamily      | 1259 | 1499 | P-loop containing nucleoside triphosphate hydrolase          | SSF52540     |
| 22 | CDD              | 1265 | 1485 | -                                                            | cd03244      |
| 23 | PROSITE profiles | 1267 | 1501 | ABC transporter-like, ATP-binding domain                     | PS50893      |
| 24 | Pfam             | 1284 | 1432 | ABC transporter-like, ATP-binding domain                     | PF00005      |
| 25 | SMART            | 1293 | 1478 | AAA+ ATPase domain                                           | SM00382      |



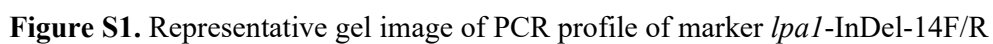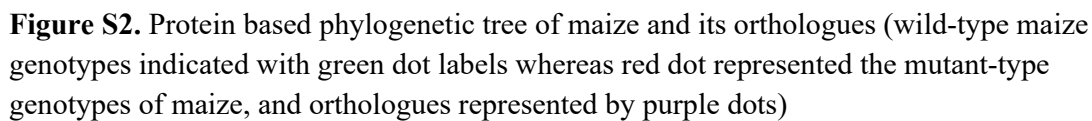

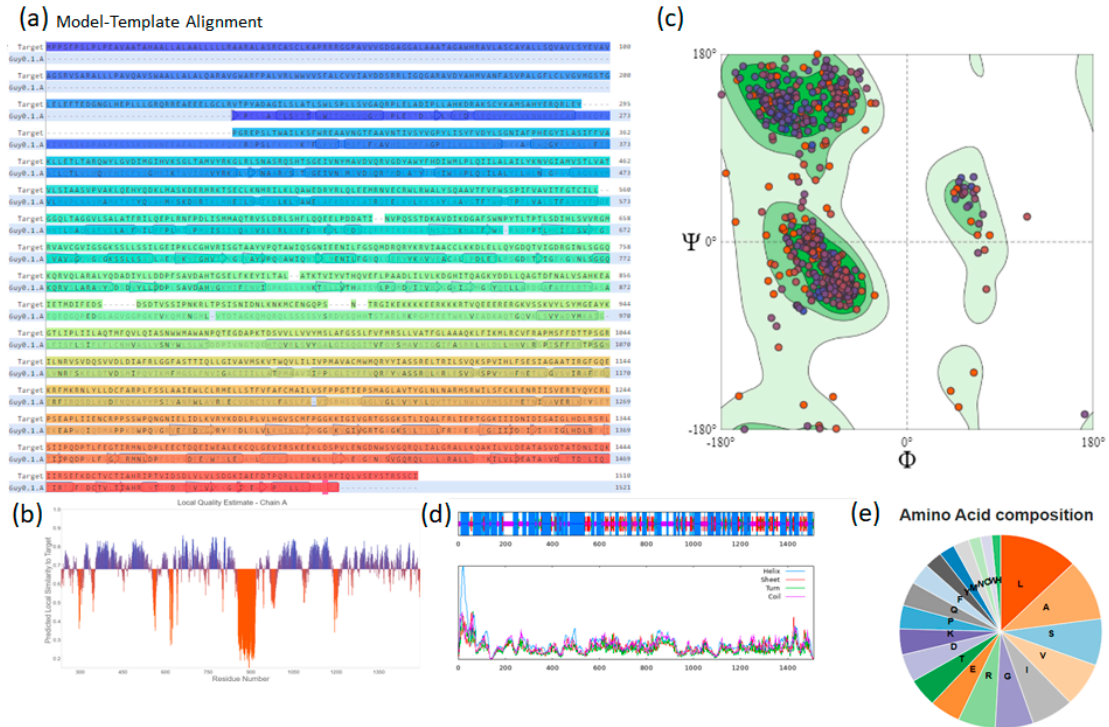

**Figure S3.** Homology based LPA1 protein (protein ID: A7KVC2), (a) alignment with 6uy0.1.A (Bovine) template by Swiss Model; (b) Local quality estimation (c) Ramachandran plot using Swiss Model (d) Secondary structure by SOPMA (e) amino acid compositions by predict protein tool
